# Supplementary material
Source: PubMed Central journal article supplement (PMC6588354)

## 1 **Supplemental Appendix 1: Details on IV method**

2 The IV analysis relies on several assumptions. The first is that there be a strong association  
3 between the IV and endogenous variable—in our case there is a strong association between  
4 initial hospital breastfeeding experience and breastfeeding duration and exclusivity. The second  
5 assumption requires that the instrument be exogenous and is known as the exclusion restriction.  
6 This assumption requires that hospital breastfeeding experience only impact child weight status  
7 at age 2 through breastfeeding practices. The third assumption, the stable unit treatment value,  
8 requires that there is no interference from the instrument to the obesity outcomes of other  
9 children. The final assumption is monotonicity of the instrument. While we cannot test all of  
10 these assumptions, we outline our reasoning for why our chosen instrument is likely valid.

11 We can empirically show that we have satisfied the first assumption and do so in Supplemental  
12 Table 6. Establishment of early breastfeeding in the hospital is related to the breastfeeding  
13 duration and exclusivity through three main pathways. One pathway is based on whether the  
14 newborn child can latch onto the mom shortly after birth. This initial attachment establishes the  
15 mother's milk supply and is likely dependent on both the newborn's and the mother's postpartum  
16 interactions, but unrelated to mother's preferences. Another pathway is more systematic; whether  
17 the hospital and its staff have policies and practices in place to support the mother and child  
18 initial attempts to breastfeed, such as immediate skin-to-skin contact, in rooming, support for  
19 positioning, limiting access to formula when not medically indicated etc. Previous research  
20 suggests that without this support many mothers would not or could not initiate breastfeeding.  
21 Another pathway is based on whether the mother wants to breastfeed, which will likely  
22 determine her efforts in breastfeeding at the hospital. In the context of a state such as Oregon,  
23 where 96% of mothers ultimately initiate breastfeeding, there is likely to be very little selection  
24 on the kind of mother who wants to breastfeed (poor/rich, working/not working, educated/not  
25 educated, parity) because most mothers want to and do indeed breastfeed, and therefore those  
26 who do not are predominantly those who are unable to breastfeed due to breastfeeding  
27 difficulties. The few women for whom decisions not to breastfeed are related to socioeconomic  
28 or child health factors are controlled for through our use of extensive measured control variables  
29 in PRAMS.

30 There is no empirical test of the second assumption that exclusive breastfeeding in the hospital  
31 impact child obesity only through breastfeeding practices and not through other pathways such  
32 as mothers' preferences. If mothers' preferences determined her hospital breastfeeding  
33 experience or if mothers chose the birth hospitals based on the hospital's breastfeeding support  
34 policies then our instrument would not satisfy this assumption. To explore these issues, we  
35 conducted supplemental analyses using the Maternity Practices in Infant Nutrition and Care  
36 (mPINC) survey linked to the PRAMS data. The mPINC is a survey of maternity care practices  
37 and policies administered to all hospitals and birth centers with registered maternity beds and is  
38 conducted by the CDC. We requested the county of residence for each mother in PRAMS and  
39 mapped her to her county-level mPINC scores. The mPINC score was based on a weighted  
40 average of the hospitals in each county. We examined if the county-level policies from mPINC,  
41 which should be outside the mother's control, could predict whether the child was only given  
42 only breast milk in the hospital. We find that the policies do reflect actual practice at the  
43 hospitals, and this suggests that the hospital policy was indeed driving some of the hospital  
44 experience rather than just mothers' preferences. In addition, as long as mothers are not leaving  
45 their county of residence to select hospitals, then any selection into specific hospitals is likely to  
46 have little effect on breastfeeding experiences. As mentioned in the main text, much of the

47 mothers' breastfeeding experience in the hospital is likely dependent of the initial attempts to  
48 latch and the hospital support for the breastfeeding. In addition, 96% of mothers ultimately  
49 initiate breastfeeding in Oregon. Therefore there is likely to be very little selection on the kind of  
50 mother who wants to breastfeed. We control for many socioeconomic and child health  
51 characteristics that may be related to early breastfeeding experiences and preferences.  
52 Controlling for these key observable characteristic, mothers' hospital breastfeeding experience  
53 can be considered somewhat random and not dependent on her preferences.

54 The third assumption requires that the treatment, the breastfeeding practices of mothers during  
55 the newborn hospitalization, do not affect the obesity outcomes of other children. In our study,  
56 the breastfeeding practices of mothers during the newborn hospitalization should/do not affect  
57 the obesity outcomes of other children. The treatment takes place during a very short time  
58 window at the hospital, and we can think of no conceivable pathway where there could be  
59 interference from one mother's breastfeeding practices in the newborn hospitalization to the  
60 obesity outcomes for other mother's child.

61

62 The final assumption, monotonicity, is trivially satisfied because our instrument has only two  
63 levels.

64

65

66

67

68

69 **Supplemental Appendix 2: Details on Sampling and Selection**

70 The Oregon PRAMS data set uses complex sample weights to adjust for oversampling of  
71 underrepresented racial and ethnic populations, and low birth weight infants, and to adjust for  
72 non-respondents. Underrepresented racial and ethnic groups and low birth weight infants are  
73 oversampled. In addition to oversampling of underrepresented populations, Oregon PRAMS also  
74 adds a nonresponse weight to account for women who may be less likely to respond to the  
75 surveys. This weight is devised within each sampling stratum after comparing non- respondents  
76 with respondents and assumes that those who did not respond would have provided answers that  
77 are similar to those respondents who shared their demographic characteristics Finally, a non-  
78 coverage weight is applied to account for women who may have been excluded from the  
79 sampling frame due to accidental duplication in birth certificate records and missing files. The  
80 final weight is the product of these three weights (sampling, non-response, and non-coverage  
81 weights), and is applied to the entire dataset for all analyses. The weighted means in Table 1  
82 were calculated using the sample weight function in STATA 13 (23).

83 While the sampling weights in the Oregon PRAMS allow for mean estimates to reflect  
84 population estimates, there is further selection in responses to questions that may undermine the  
85 representativeness of our analytical sample. Based on the PRAMS sampling design, the 885  
86 mothers who responded to both surveys are representative of approximately 45,000 mothers. The  
87 sampling weights should make the 885 mothers representative of births in Oregon in 2009. The  
88 493 mothers in the analytical sample for whom we have all the control variables of interest  
89 represent approximately 27,000 mothers. We explore the extent to which these two samples  
90 differ systematically. In Supplemental Table 2 we present the weighted means for each group for  
91 the main variables of interest and key demographic variables. While there are no difference in  
92 the main variables of interest such as child weight, breastfeeding or hospital experiences, there  
93 are differences in demographic variables such that the analytical sample is whiter, more educated  
94 and richer than the overall sample. Consequently we acknowledge that our findings, while  
95 internally consistent, may not be representative for all births in Oregon in 2009.

96

97

98 **Supplemental Tables**

99

100 Supplemental Table 1: Sample inclusion

101

102

| Sample Inclusion Table             | Observations | Observations Lost |
|------------------------------------|--------------|-------------------|
| In both waves of PRAMS and PRAMS-2 | 885          |                   |
| Have weight measure                | 818          | 67                |
| Have height measure                | 639          | 179               |
| Have age for BMI and not outlier   | 625          | 14                |
| Have all covariates                | <b>493</b>   | 132               |
| Have breastfeeding variables       | <b>483</b>   | 10                |
| Have hospital variables            | <b>432</b>   | 51                |

103

104 \* Final sample size depends on the regression specification.

105

106

107

108

109

110

111

112

113

114

115

116

117

118

119

120

121 Supplemental Table 2: Overall and Analytical Sample  
 122

|                                                                  | Weighted Overall Sample                                     |      |     | Weighted Analytical Sample                                                            |      |     |
|------------------------------------------------------------------|-------------------------------------------------------------|------|-----|---------------------------------------------------------------------------------------|------|-----|
|                                                                  | Oregon PRAMS with completed initial and follow-back surveys |      |     | Oregon PRAMS with completed initial and follow-back surveys and no missing covariates |      |     |
|                                                                  | Mean                                                        | SE   | N   | Mean                                                                                  | SE   |     |
| <b>Child Weight Variables</b>                                    |                                                             |      |     |                                                                                       |      |     |
| Overweight                                                       | 27%                                                         |      | 624 | 24%                                                                                   |      | 487 |
| Child obese                                                      | 12%                                                         |      | 624 | 11%                                                                                   |      | 487 |
| <b>Breastfeeding Practice Variables</b>                          |                                                             |      |     |                                                                                       |      |     |
| Ever Breastfed                                                   | 94%                                                         |      | 865 | 96%                                                                                   |      | 493 |
| Weeks Breastfed                                                  | 38.73                                                       | 1.77 | 863 | 40.76                                                                                 | 1.92 | 487 |
| Weeks Breastfed Exclusively                                      | 17.36                                                       | 0.80 | 857 | 17.72                                                                                 | 0.92 | 483 |
| <b>Hospital Experience Variable</b>                              |                                                             |      |     |                                                                                       |      |     |
| Hospital staff gave mom information about breastfeeding          | 94%                                                         |      | 794 | 94%                                                                                   |      | 452 |
| My baby was fed only breast milk at the hospital                 | 71%                                                         |      | 792 | 74%                                                                                   |      | 453 |
| Hospital staff gave mom phone number to call about breastfeeding | 87%                                                         |      | 793 | 89%                                                                                   |      | 453 |
| <b>Maternal Race/Ethnicity ***</b>                               |                                                             |      |     |                                                                                       |      |     |
| Non-Hispanic White                                               | 68%                                                         |      | 884 | 76%                                                                                   |      | 493 |
| Hispanic                                                         | 21%                                                         |      | 884 | 14%                                                                                   |      | 493 |
| Non-Hispanic Asian/PI                                            | 6%                                                          |      | 884 | 6%                                                                                    |      | 493 |
| Non-Hispanic Black                                               | 3%                                                          |      | 884 | 1%                                                                                    |      | 493 |
| Non-Hispanic AI/AN                                               | 3%                                                          |      | 884 | 2%                                                                                    |      | 493 |
| <b>Income Groups***</b>                                          |                                                             |      |     |                                                                                       |      |     |
| Less than \$20,000                                               | 35%                                                         |      | 852 | 22%                                                                                   |      | 493 |
| \$20,000 to \$34,999                                             | 19%                                                         |      | 852 | 19%                                                                                   |      | 493 |
| \$35,000 to \$69,999                                             | 22%                                                         |      | 852 | 26%                                                                                   |      | 493 |
| \$70,000 or more                                                 | 24%                                                         |      | 852 | 33%                                                                                   |      | 493 |
| <b>Maternal Education***</b>                                     |                                                             |      |     |                                                                                       |      |     |
| Less than High School Graduate                                   | 19%                                                         |      | 879 | 10%                                                                                   |      | 493 |
| High School Graduate                                             | 22%                                                         |      | 879 | 23%                                                                                   |      | 493 |
| Some College                                                     | 31%                                                         |      | 879 | 30%                                                                                   |      | 493 |
| Bachelors or more                                                | 28%                                                         |      | 879 | 38%                                                                                   |      | 493 |
| <b>Paternal Education ***</b>                                    |                                                             |      |     |                                                                                       |      |     |
| Less than High School Graduate                                   | 17%                                                         |      | 800 | 12%                                                                                   |      | 493 |
| High School Graduate                                             | 24%                                                         |      | 800 | 21%                                                                                   |      | 493 |
| Some College                                                     | 30%                                                         |      | 800 | 33%                                                                                   |      | 493 |
| Bachelors or more                                                | 28%                                                         |      | 800 | 34%                                                                                   |      | 493 |

\*\*\* p<0.01 across groups

123  
124  
125

Supplemental Table 3: Breastfeeding variables by weight groups

|                             | Obese |        |       | Overweight |        |       | Normal |        |       | N   |
|-----------------------------|-------|--------|-------|------------|--------|-------|--------|--------|-------|-----|
|                             | Mean  | 95% CI |       | Mean       | 95% CI |       | Mean   | 95% CI |       |     |
| Ever Breastfed*             | 86%   | 68%    | 100%  | 91%        | 82%    | 100%  | 98%    | 96%    | 100%  | 54  |
| Weeks Breastfed             | 38.42 | 24.19  | 52.65 | 35.68      | 26.48  | 44.89 | 42.28  | 38.22  | 46.34 | 117 |
| Weeks breastfed exclusively | 16.18 | 10.60  | 21.76 | 14.13      | 10.90  | 17.36 | 18.78  | 16.64  | 20.93 | 360 |

126 \*Estimates larger than 100% were capped.

127 Supplemental Table 4: Source of each variable

|                                                         | Birth Certificate | PRAMS Survey | PRAMS-2 Survey |
|---------------------------------------------------------|-------------------|--------------|----------------|
| <b>Weight and Breastfeeding Variables</b>               |                   |              |                |
| Child BMI                                               |                   |              | X              |
| Child overweight                                        |                   |              | X              |
| Child obese                                             |                   |              | X              |
| Ever Breastfed                                          |                   |              | X              |
| Weeks Breastfed                                         |                   |              | X              |
| Weeks breastfed exclusively                             |                   |              | X              |
| <b>Pregnancy Health</b>                                 |                   |              |                |
| Gestational diabetes during pregnancy                   | X                 |              |                |
| <b>Income Groups</b>                                    |                   |              |                |
| <b>Maternal Employment Status During Pregnancy</b>      |                   |              |                |
| <b>Maternal Race/ethnicity</b>                          | X                 |              |                |
| <b>Maternal Marital Status</b>                          | X                 |              |                |
| <b>Maternal Weight</b>                                  |                   |              |                |
| <b>Weight gain</b>                                      |                   | X            | X              |
| <b>Maternal age at birth</b>                            | X                 |              |                |
| <b>Maternal Education</b>                               | X                 |              |                |
| <b>Paternal Education</b>                               | X                 |              |                |
| <b>Child Birth Weight</b>                               | X                 |              |                |
| <b>Number of Prenatal visits</b>                        | X                 |              |                |
| <b>Number of Previous Live births</b>                   | X                 |              |                |
| <b>Financial support</b>                                |                   |              |                |
| Insurance at 3 months                                   |                   | X            |                |
| Child Ever WIC                                          |                   |              | X              |
| <b>Main Hospital Support Variables</b>                  |                   |              |                |
| My baby was fed only breast milk at the hospital        |                   | X            |                |
| Hospital staff gave mom information about breastfeeding |                   | X            |                |

128

129

130

131 Supplemental Table 5: Hospital Breastfeeding Experience and Support Variables

---

**Hospital Breastfeeding Encouragement Questions**

---

Hospital staff gave me information about breastfeeding

My baby stayed in the same room with me at the hospital

I breastfed my baby in the hospital

I breastfed my baby in the first hour after my baby was born

Hospital staff helped me learn how to breastfeed

My baby was fed only breast milk at the hospital

Hospital staff told me to breastfeed whenever my baby wanted

The hospital gave me a gift pack with formula

The hospital gave me a telephone number to call for help with breastfeeding

My baby used a pacifier in the hospital

---

132



133 Supplemental Table 6: Associations between hospital policies and breastfeeding duration. Each  
 134 cell presents the estimated coefficient from a single regression.

135  
 136

| Hospital Variables, collected at 3 months                    | Weeks Breastfed (collected at 25 months or later) | Weeks Breastfed Exclusively (collected at 25 months or later) |
|--------------------------------------------------------------|---------------------------------------------------|---------------------------------------------------------------|
| Hospital staff gave me information about breastfeeding       | -9.69<br>[8.407]                                  | 7.905**<br>[2.698]                                            |
| My baby stayed in the same room in hospital                  | 1.57<br>[8.140]                                   | 2.619<br>[4.143]                                              |
| I breastfed my baby in the hospital                          | 13.77<br>[11.65]                                  | 1.209<br>[4.532]                                              |
| I breastfed in the first hour after my baby was born         | 2.367<br>[7.458]                                  | 1.847<br>[3.820]                                              |
| Hospital staff helped me learn how to breastfeed             | -5.087<br>[6.617]                                 | -1.079<br>[2.456]                                             |
| My baby was fed only breast milk at the hospital             | 7.194*<br>[2.968]                                 | 8.847**<br>[1.963]                                            |
| Hospital staff told me to breastfeed whenever my baby wanted | 2.479<br>[5.937]                                  | -2.523<br>[4.234]                                             |
| The hospital gave me a gift pack with formula                | -2.388<br>[4.422]                                 | -1.833<br>[2.368]                                             |
| The hospital gave me a telephone number to call for help     | -11.18<br>[8.696]                                 | 4.095<br>[2.758]                                              |
| My baby used a pacifier in the hospital                      | -3.712<br>[2.254]                                 | -4.092<br>[2.605]                                             |
| Observations in each of 20 regressions                       | 438                                               | 432                                                           |

137  
 138 **Results in the table are from 20 individual regressions.**

139  
 140 In each cell the estimated coefficient between a hospital policy and breastfeeding duration or  
 141 duration exclusivity is presented. All regression models include control variables for mother's  
 142 income, mother's education, mother's employment, mother's marital status, mother's age,  
 143 mother's weight, mother's height, mother's weight gain during pregnancy, mother's parity,  
 144 number of prenatal visits, mother's insurance status, mother's gestational diabetes, child's race,  
 145 child's birth weight, child's ever being on WIC, father's education and county of residence  
 146 fixed-effects. Weighted standard errors in brackets.

147  
 148 \*\* p<0.01, \* p<0.05, <sup>α</sup> p<0.1

149  
 150

151 Supplemental Table 7: Association between Breastfeeding Practices and Obesity Status at age 2.

LOGISTIC REGRESSION MODEL- ODDS RATIOS PRESENTED

| VARIABLES                             | Overweight                             |                                       |                            | Child obese                           |                                        |                             |
|---------------------------------------|----------------------------------------|---------------------------------------|----------------------------|---------------------------------------|----------------------------------------|-----------------------------|
|                                       |                                        |                                       |                            |                                       |                                        |                             |
| Ever Breastfed                        | 0.411 <sup>α</sup><br>[0.152 - 1.107]  |                                       |                            | 0.0907**<br>[0.0208 - 0.395]          |                                        |                             |
| Weeks Breastfed                       |                                        | 0.987**<br>[0.979 - 0.995]            |                            |                                       | 0.989<br>[0.976 - 1.003]               |                             |
| Weeks Breastfed Exclusively           |                                        |                                       | 0.977<br>[0.947 - 1.007]   |                                       |                                        | 1.004<br>[0.976 - 1.032]    |
| Gestational diabetes during pregnancy | 0.364 <sup>α</sup><br>[0.113 - 1.168]  | 0.401<br>[0.0985 - 1.635]             | 0.367<br>[0.0912 - 1.473]  | 1.103<br>[0.267 - 4.568]              | 1.164<br>[0.273 - 4.964]               | 0.891<br>[0.181 - 4.374]    |
| <b>Income Groups</b>                  |                                        |                                       |                            |                                       |                                        |                             |
| \$20,000 to \$34,999                  | 0.251 <sup>α</sup><br>[0.0529 - 1.193] | 0.32<br>[0.0522 - 1.959]              | 0.354<br>[0.0674 - 1.862]  | 0.130**<br>[0.0312 - 0.544]           | 0.107**<br>[0.0239 - 0.476]            | 0.125**<br>[0.0286 - 0.546] |
| \$35,000 to \$69,999                  | 0.806<br>[0.217 - 2.993]               | 0.966<br>[0.197 - 4.732]              | 1.097<br>[0.240 - 5.005]   | 0.768<br>[0.192 - 3.067]              | 0.867<br>[0.245 - 3.074]               | 0.965<br>[0.298 - 3.117]    |
| \$70,000 or more                      | 0.387<br>[0.0846 - 1.774]              | 0.322<br>[0.0442 - 2.342]             | 0.423<br>[0.0534 - 3.349]  | 0.138**<br>[0.0226 - 0.841]           | 0.189 <sup>α</sup><br>[0.0345 - 1.034] | 0.283<br>[0.0510 - 1.576]   |
| <b>Marital Status</b>                 |                                        |                                       |                            |                                       |                                        |                             |
| Not Married                           | 2.613*<br>[1.095 - 6.238]              | 2.762*<br>[1.118 - 6.823]             | 2.852*<br>[1.146 - 7.101]  | 4.457**<br>[1.772 - 11.21]            | 4.919**<br>[2.148 - 11.26]             | 5.245**<br>[2.254 - 12.20]  |
| Maternal Weigh gain during pregnancy  | 0.999<br>[0.968 - 1.031]               | 1.001<br>[0.971 - 1.032]              | 1.002<br>[0.969 - 1.036]   | 1.002<br>[0.969 - 1.036]              | 1.002<br>[0.963 - 1.042]               | 1.006<br>[0.966 - 1.048]    |
| Maternal Weight                       | 1.000<br>[0.994 - 1.006]               | 0.995*<br>[0.990 - 1.000]             | 0.996<br>[0.990 - 1.002]   | 1.007<br>[0.997 - 1.017]              | 1.003<br>[0.993 - 1.014]               | 1.003<br>[0.993 - 1.014]    |
| Mom Height                            | 0.999<br>[0.990 - 1.008]               | 0.998<br>[0.987 - 1.009]              | 0.997<br>[0.987 - 1.007]   | 0.992<br>[0.981 - 1.002]              | 0.994<br>[0.984 - 1.004]               | 0.992<br>[0.982 - 1.003]    |
| Child Birth weight                    | 1.001<br>[1.000 - 1.001]               | 1.001 <sup>α</sup><br>[1.000 - 1.002] | 1.001<br>[1.000 - 1.002]   | 1.002**<br>[1.000 - 1.003]            | 1.002**<br>[1.001 - 1.003]             | 1.001**<br>[1.000 - 1.002]  |
| <b>Financial support</b>              |                                        |                                       |                            |                                       |                                        |                             |
| Child Ever WIC                        | 0.731<br>[0.237 - 2.253]               | 1.246<br>[0.324 - 4.792]              | 1.447<br>[0.392 - 5.339]   | 1.05<br>[0.378 - 2.921]               | 0.863<br>[0.352 - 2.117]               | 1.054<br>[0.442 - 2.513]    |
| No Insurance                          | 3.084**<br>[1.534 - 6.201]             | 3.531**<br>[1.472 - 8.473]            | 3.334**<br>[1.452 - 7.654] | 4.455 <sup>α</sup><br>[0.998 - 19.90] | 5.196*<br>[1.112 - 24.28]              | 5.791*<br>[1.450 - 23.13]   |
| Observations                          | 486                                    | 456                                   | 451                        | 436                                   | 436                                    | 433                         |
| County FE                             | YES                                    | YES                                   | YES                        | YES                                   | YES                                    | YES                         |
| Model                                 | Logistic Regression                    | Logistic Regression                   | Logistic Regression        | Logistic Regression                   | Logistic Regression                    | Logistic Regression         |

152 Controlling for parity, prenatal visits, father's education, mother's age, mother's education,  
 153 mother's employment status, child's race and county of residence fixed-effects.

154 Robust and weighted 95% confidence intervals in brackets. \*\* p<0.001 \* p<0.01, <sup>α</sup> p<0.05

155  
156

157 Supplemental Table 8: Extended results from first-stage regressions  
 158

| VARIABLES                                        | First Stage Regressions |                             |
|--------------------------------------------------|-------------------------|-----------------------------|
|                                                  | Weeks Breastfed         | Weeks breastfed exclusively |
| My baby was fed only breast milk at the hospital | 7.182 <sup>α</sup>      | 8.893**                     |
|                                                  | [-0.461-14.825]         | [5.004-12.782]              |
| Gestational diabetes during pregnancy            | 4.142                   | 1.085                       |
|                                                  | [-8.536-16.819]         | [-5.301-7.471]              |
| <b>Income Groups</b>                             |                         |                             |
| 20000 to 34999                                   | -2.467                  | -2.081                      |
|                                                  | [-12.602-7.667]         | [-6.299-2.138]              |
| 35000 to 69999                                   | -2.38                   | -1.551                      |
|                                                  | [-15.881-11.121]        | [-9.271-6.17]               |
| 70000 or more                                    | -6.465                  | -0.465                      |
|                                                  | [-20.39-7.46]           | [-7.33-6.4]                 |
| <b>Marital Status</b>                            |                         |                             |
| Not Married                                      | -4.54                   | -2.614                      |
|                                                  | [-13.394-4.313]         | [-6.358-1.131]              |
| Maternal Weigh gain during pregnancy             | -0.225                  | -0.112                      |
|                                                  | [-0.482-0.032]          | [-0.102--0.008]             |
| Maternal Weight                                  | -0.147*                 | -0.0551 <sup>α</sup>        |
|                                                  | [-0.246 -0.048]         | [-0.273-0.049]              |
| Child Birth weight                               | 0.00863 <sup>α</sup>    | 0.00287 <sup>α</sup>        |
|                                                  | [0.002-0.016]           | [0-0.006]                   |
| <b>Financial support</b>                         |                         |                             |
| Child Ever WIC                                   | -9.496                  | -1.241                      |
|                                                  | [-20.327-1.334]         | [-6.402-3.92]               |
| No Insurance at two months                       | 3.025                   | -3.318                      |
|                                                  | [-7.281-13.33]          | [-6.72-0.085]               |
| Observations                                     | 439                     | 441                         |
| Model                                            | xtreg                   | xtreg                       |

159 Ordinary least squares models control for parity, number of prenatal visits, father's education,  
 160 mother's age, mother's education, mother's employment status, mother's height, child's race and  
 161 county of residence. Robust 95% confidence intervals in brackets. \*\* p<0.001 \* p<0.01, <sup>α</sup>  
 162 p<0.05  
 163  
 164

165 Supplemental Table 9: Sensitivity Analysis of Instrumental Variable Estimates on the Effect of  
 166 Breastfeeding Exclusivity on Child Obesity Status at age 2  
 167  
 168  
 169

|                                       | 1 Instrument<br>BFH5ONLY<br>(+)       | 2 Instruments<br>BFH5ONLY(+)<br>BFH5INFO(+) |
|---------------------------------------|---------------------------------------|---------------------------------------------|
| <b>Panel A. Child overweight</b>      |                                       |                                             |
| Weeks of breastfeeding exclusivity    | -0.008<br>[-.019 - .003]              | -0.0106 <sup>α</sup><br>[-0.023 - 0.002]    |
| <b>Panel B. Child obese</b>           |                                       |                                             |
| Weeks of breastfeeding exclusivity    | -0.0066 <sup>α</sup><br>[-.014- .001] | -0.0064<br>[-0.016 - 0.003]                 |
| F-statistic of excluded instrument(s) | 21.94                                 | 13.54                                       |
| County FE                             | YES                                   | YES                                         |
| Pass over-identification test         |                                       | YES                                         |

170  
 171  
 172 Estimates from instrumental variables linear probability models.  
 173 Models control for mother’s income, mother’s education, mother’s employment, mother’s  
 174 marital status, mother’s age, mother’s weight, mother’s height, mother’s weight gain during  
 175 pregnancy, mother’s parity, number of prenatal visits, mother’s insurance status, mother’s  
 176 gestational diabetes, child’s race, child’s birth weight, child’s ever being on WIC, father’s  
 177 education and county of residence fixed-effects.  
 178 Weighted standard errors clustered at the county level are used to calculate confidence intervals.  
 179 \*\* p<0.01, \* p<0.05, <sup>α</sup> p<0.1  
 180

181 Supplemental Table 10: Reduced Form Regressions for hospital experience and child weight  
 182 outcomes  
 183

|                                                  | Overweight                                 | Child obese                               |
|--------------------------------------------------|--------------------------------------------|-------------------------------------------|
| My baby was fed only breast milk at the hospital | -0.0676 <sup>α</sup><br>[-0.139 - 0.00340] | -0.0513*<br>[-0.0975 - -0.00521]          |
| Gestational diabetes during pregnancy            | 0.0829<br>[-0.116 - 0.282]                 | 0.140**<br>[0.0290 - 0.252]               |
| <b>Income Groups</b>                             |                                            |                                           |
| 20000 to 34999                                   | -0.137 <sup>α</sup><br>[-0.293 - 0.0187]   | -0.132**<br>[-0.231 - -0.0334]            |
| 35000 to 69999                                   | -0.128<br>[-0.328 - 0.0722]                | -0.0891<br>[-0.233 - 0.0548]              |
| 70000 or more                                    | -0.146<br>[-0.361 - 0.0687]                | -0.0737<br>[-0.228 - 0.0809]              |
| <b>Marital Status</b>                            |                                            |                                           |
| Married                                          | 0.0678<br>[-0.0916 - 0.227]                | 0.0536*<br>[0.000282 - 0.107]             |
| Maternal Weigh gain during pregnancy             | 0.00243<br>[-0.00121 - 0.00606]            | 0.000947<br>[-0.000663 - 0.00256]         |
| Maternal Weight                                  | 0.000121<br>[-0.000773 - 0.00102]          | 0.0000151<br>[-0.000727 - 0.000757]       |
| Child Birth weight                               | 9.63e-05*<br>[1.31e-05 - 0.000180]         | 7.41e-05**<br>[2.65e-05 - 0.000122]       |
| <b>Financial support</b>                         |                                            |                                           |
| Child Ever WIC                                   | 0.0561<br>[-0.115 - 0.227]                 | 0.0720 <sup>α</sup><br>[-0.00715 - 0.151] |
| No Insurance at two months                       | 0.0555<br>[-0.0338 - 0.145]                | -0.0101<br>[-0.0716 - 0.0515]             |
| Observations                                     | 441                                        | 441                                       |
| Model                                            | xtreg                                      | xtreg                                     |
| County FE                                        | YES                                        | YES                                       |

184  
 185  
 186 Linear regression models controlling for parity, prenatal visits, father's education, mother's age,  
 187 mother's education, mother's employment status, mother's height, child's race, and county of  
 188 residence.

189  
 190 Robust clustered 95% confidence intervals in brackets. \*\* p<0.01, \* p<0.05, <sup>α</sup> p<0.1  
 191

192 **Supplemental Figures**

193

194 Supplemental Figure 1: Conceptual diagram of IV estimation

195

196

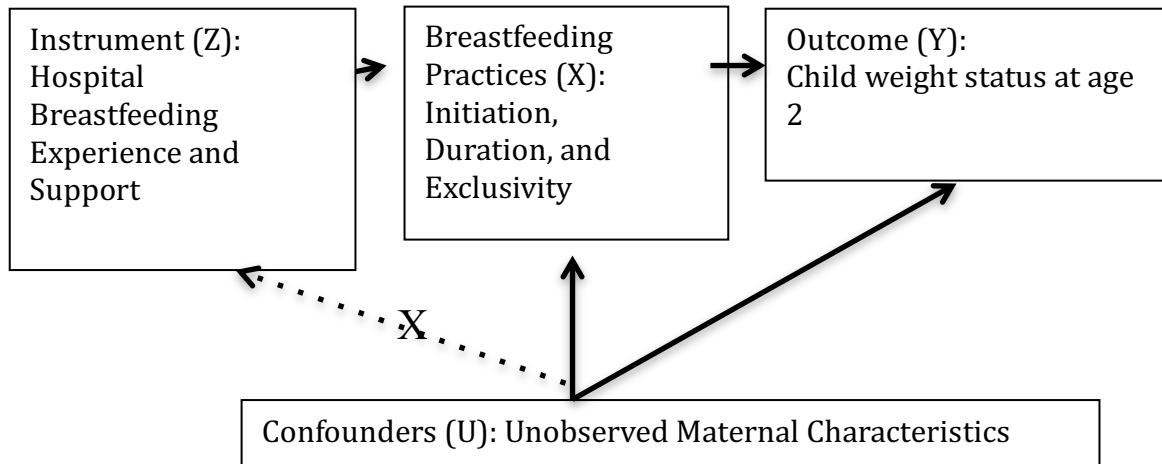

197

198

199

200

Supplemental Figure 2: Duration of Breastfeeding & Breastfeeding Exclusivity by Breastfeeding Experience in Hospital  
Panel A: Survival Plot of Duration of Breastfeeding by Breastfeeding Experience in Hospital

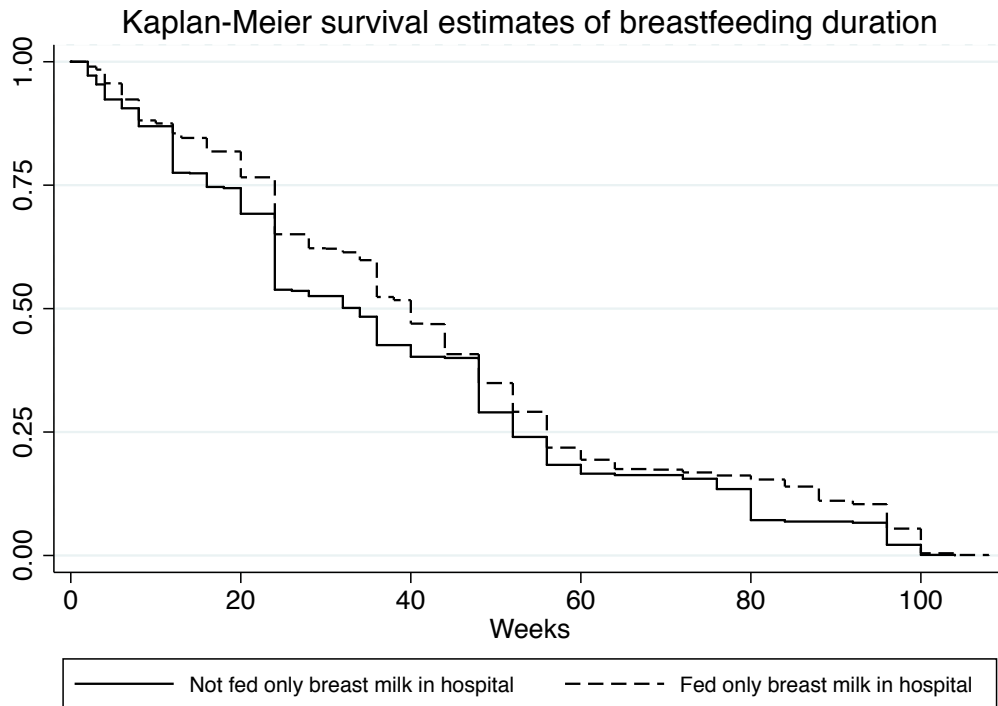

Panel B: Survival Plot of Duration of Breastfeeding Exclusivity by Breastfeeding Experience in Hospital

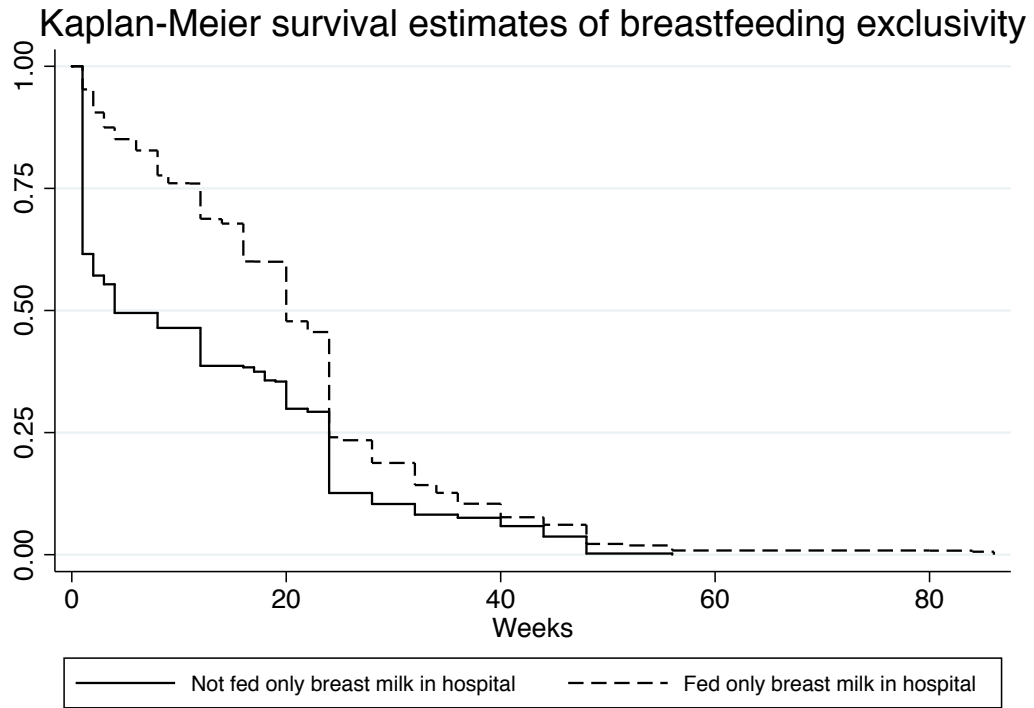

Supplement: NIHMS1024788-supplement-2.pdf [file NIHMS1024788-supplement-2.pdf]
